# Supplementary material for: Magnetic delivery of Fe3O4@polydopamine nanoparticle-loaded natural killer cells suggest a promising anticancer treatment
Source: Royal Society of Chemistry journal article supplement (doi:10.1039/c8bm00588e), 2018-01-01
Supplement: c8bm00588e1.pdf [file c8bm00588e1.pdf]

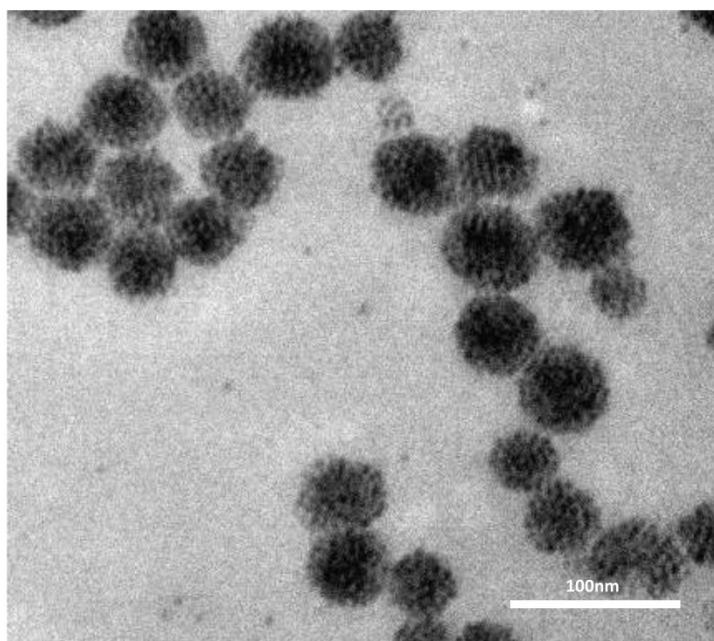

**Figure S1.** TEM image of Fe<sub>3</sub>O<sub>4</sub> NPs. Scale bar = 100 nm

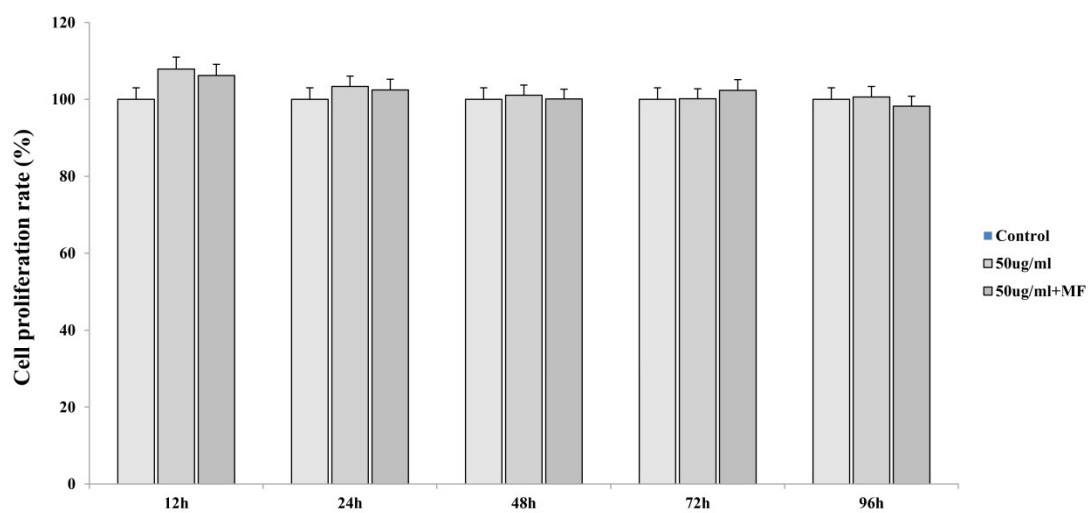

**Figure S2.** CCK-8 assay showing that magnetic field had no significant effect on the NK cell viability

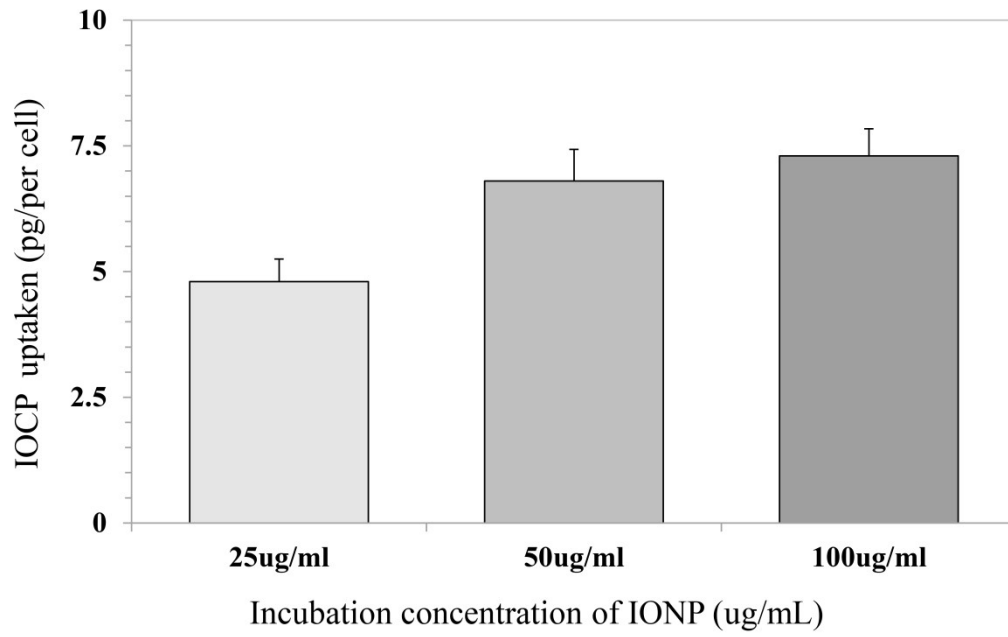

**Figure S3.** The amount of iron uptaken in NK cells was determined by ICP-MS. IONP,  $\text{Fe}_3\text{O}_4@PDA$  NPs; ICP-MS, inductively coupled plasma mass spectrometry

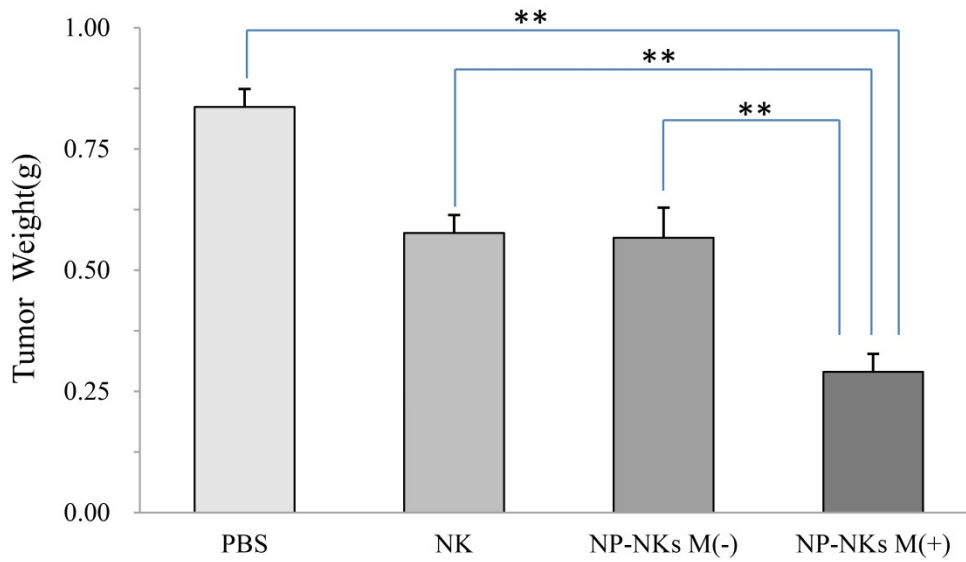

**Figure S4.** The tumor weights of each group after 18 days treatment. \*\*p < 0.01.
